# Supplementary material for: Extended mobility scale (AMEXO) for assessing mobilization and setting goals after gastrointestinal and oncological surgery: a before-after study
Source: Springer Nature journal article supplement (doi:10.1186/s12893-021-01445-3), 2022-02-02
Supplement: MOESM1 [file 20093392]

**Additional File 1.** Content of the JH-HLM<sup>a</sup> scale and AMEXO<sup>b</sup> scale

| Mobility scale |       | Mobility score | Actual mobilization <sup>c</sup>               |
|----------------|-------|----------------|------------------------------------------------|
|                | AMEXO | <b>12</b>      | Walking approximately 3750 ft / 1125 m or more |
|                | AMEXO | <b>11</b>      | Walking approximately 2500 ft / 750 m or more  |
|                | AMEXO | <b>10</b>      | Walking approximately 1500 ft / 450 m or more  |
|                | AMEXO | <b>9</b>       | Walking approximately 750 ft / 225 m or more   |
| JH-HLM         | AMEXO | <b>8</b>       | Walking approximately 250 ft / 75 m or more    |
| JH-HLM         | AMEXO | <b>7</b>       | Walking approximately 25 ft / 7.5 m or more    |
| JH-HLM         | AMEXO | <b>6</b>       | Walking 10 or more steps                       |
| JH-HLM         | AMEXO | <b>5</b>       | Standing for greater than or equal to 1 minute |
| JH-HLM         | AMEXO | <b>4</b>       | Transferring to chair                          |
| JH-HLM         | AMEXO | <b>3</b>       | Sitting at edge of bed                         |
| JH-HLM         | AMEXO | <b>2</b>       | Bed activities                                 |
| JH-HLM         | AMEXO | <b>1</b>       | Only lying in bed                              |

Legend: <sup>a</sup> = John Hopkins Highest Level of Mobility; <sup>b</sup> = Amsterdam UMC Extension of the John Hopkins Highest Level of mObility; <sup>c</sup> = on each postoperative day (i.e., 24h), assessed per nursing shift (e.g., day shift with ambulation distance of 300m and evening shift with ambulation distance of 460m means AMEXO 10 on that postoperative day); ft = feet; m = meters
