# Supplementary material for: Extended mobility scale (AMEXO) for assessing mobilization and setting goals after gastrointestinal and oncological surgery: a before-after study
Source: Springer Nature journal article supplement (doi:10.1186/s12893-021-01445-3), 2022-02-02
Supplement: MOESM2 [file 20093392]

**Additional File 2.** Distribution of mobility scores using the JH-HLM and AMEXO scales during the first three postoperative days (not imputed data)

| Measurement instrument                                |                                                | JH-HLM <sup>a</sup> scale (n = 135) |                    |                    | AMEXO <sup>b</sup> scale (n = 238) |                    |                     |
|-------------------------------------------------------|------------------------------------------------|-------------------------------------|--------------------|--------------------|------------------------------------|--------------------|---------------------|
| Postoperative Day, Mobility score <sup>c</sup> (n, %) |                                                | Day 1                               | Day 2              | Day 3              | Day 1                              | Day 2              | Day 3               |
| Missing Data (n)                                      |                                                |                                     | (n = 35,<br>25.9%) | (n = 60,<br>44.4%) |                                    | (n = 99,<br>41.6%) | (n = 134,<br>56.3%) |
| Score 12                                              | Walking approximately 3750 ft / 1125 m or more | N/A                                 | N/A                | N/A                | 4 (1.7)                            | 9 (3.8)            | 10 (4.2)            |
| Score 11                                              | Walking approximately 2500 ft / 750 m or more  | N/A                                 | N/A                | N/A                | 9 (3.8)                            | 3 (1.3)            | 9 (3.8)             |
| Score 10                                              | Walking approximately 1500 ft / 450 m or more  | N/A                                 | N/A                | N/A                | 17 (7.1)                           | 12 (5.0)           | 12 (5.0)            |
| Score 9                                               | Walking approximately 750 ft / 225 m or more   | N/A                                 | N/A                | N/A                | 28 (11.8)                          | 37 (15.5)          | 24 (10.1)           |
| Score 8                                               | Walking approximately 250 ft / 75 m or more    | 61 (45.2)                           | 72 (53.3)          | 52 (38.5)          | 73 (30.7)                          | 41 (17.2)          | 26 (10.9)           |
| Score 7                                               | Walking approximately 25 ft / 7.5 m or more    | 17 (12.6)                           | 9 (6.7)            | 12 (8.9)           | 38 (16.0)                          | 20 (8.4)           | 12 (5.0)            |
| Score 6                                               | Walking 10 or more steps                       | 16 (11.9)                           | 7 (5.2)            | 5 (3.7)            | 11 (4.6)                           | 5 (2.1)            | 2 (0.8)             |
| Score 5                                               | Standing for greater than or equal to 1 minute | 6 (4.4)                             | 2 (1.5)            | 3 (2.2)            | 16 (6.7)                           | 4 (1.7)            | 4 (1.7)             |
| Score 4                                               | Transferring to chair                          | 20 (14.8)                           | 6 (4.4)            | 2 (1.5)            | 16 (6.7)                           | 4 (1.7)            | 2 (0.8)             |
| Score 3                                               | Sitting at edge of bed                         | 11 (8.2)                            | 3 (2.2)            | 1 (0.7)            | 12 (5.0)                           | 2 (0.8)            | 2 (0.8)             |
| Score 2                                               | Bed activities                                 | 3 (2.2)                             | 1 (0.7)            | 0 (0.0)            | 6 (2.5)                            | 2 (0.8)            | 1 (0.4)             |
| Score 1                                               | Only lying                                     | 1 (0.7)                             | 0 (0.0)            | 0 (0.0)            | 8 (3.4)                            | 0 (0.0)            | 0 (0.0)             |

Legend: <sup>a</sup> = John Hopkins Highest Level of Mobility; <sup>b</sup> = Amsterdam UMC Extension of the John Hopkins Highest Level of mObility; <sup>c</sup> = the highest mobility score achieved on each postoperative day (i.e., 24h), assessed per nursing shift (e.g., day shift with ambulation distance of 300m and evening shift with ambulation distance of 460m means AMEXO 10 on that postoperative day); ft = feet; m = meters; N/A = not applicable.
