# Supplementary material for: Extended mobility scale (AMEXO) for assessing mobilization and setting goals after gastrointestinal and oncological surgery: a before-after study
Source: Springer Nature journal article supplement (doi:10.1186/s12893-021-01445-3), 2022-02-02
Supplement: MOESM3 [file 20093392]

**Additional File 3.** Comparing the JH-HLM scale with the AMEXO scale (not imputed data)

|                                                                                                            |                           | <b>JH-HLM<sup>a</sup> scale</b><br><b>(n = 135)</b> | <b>AMEXO<sup>b</sup> scale</b><br><b>(n = 238)</b> | <b>Odds ratio (95% CI)</b> | <b>p-value</b> |
|------------------------------------------------------------------------------------------------------------|---------------------------|-----------------------------------------------------|----------------------------------------------------|----------------------------|----------------|
| Patients achieved the highest mobility score on the first postoperative day <sup>c</sup>                   | Yes (n,%)                 | 61 (45.2)                                           | 4 (1.7)                                            | 0.021 (0.007-0.059)        | < 0.001        |
|                                                                                                            | No (n,%)                  | 74 (54.8)                                           | 234 (98.3)                                         |                            |                |
| Patients achieved the highest mobility score during one of the first three postoperative days <sup>c</sup> | Yes (n,%)                 | 102 (75.6)                                          | 19 (8.0)                                           | 0.028 (0.015-0.052)        | < 0.001        |
|                                                                                                            | No (n,%)                  | 33 (24.4)                                           | 219 (19.0)                                         |                            |                |
| Patients showing a change in mobility score <sup>d</sup>                                                   | Yes (n,%)                 | 60 (74.1)                                           | 137 (95.8)                                         | 7.992 (3.070-20.803)       | < 0.001        |
|                                                                                                            | No (n,%)                  | 21 (25.9)                                           | 6 (4.2)                                            |                            |                |
|                                                                                                            | Missing data <sup>e</sup> | <i>n</i> = 54                                       | <i>n</i> = 95                                      |                            |                |
| Patients who showed a change in mobility score and scored 9 – 12                                           | Yes (n,%)                 | N/A                                                 | 84 (56.4)                                          | N/A                        | N/A            |
|                                                                                                            | No (n,%)                  |                                                     | 65 (43.6)                                          |                            |                |
|                                                                                                            | Missing data <sup>e</sup> |                                                     | <i>n</i> = 89                                      |                            |                |

Legend: <sup>a</sup> = John Hopkins Highest Level of Mobility; <sup>b</sup> = Amsterdam UMC Extension of the John Hopkins Highest Level of mObility; <sup>c</sup> = i.e. JH-HLM scale maximum score of 8; AMEXO scale maximum score of 12; <sup>d</sup> = a change is defined as a difference in mobility score of at least one point on one of the first three postoperative days; <sup>e</sup> = unable to compute variable due to missing data on both the second postoperative day and third postoperative day; CI = Confidence intervals; N/A = not applicable.
